# Supplementary material for: Job Offers to Individuals With Severe Mental Illness After Participation in Virtual Reality Job Interview Training
Source: Atypon-hosted journal article supplement (doi:10.1176/appi.ps.201400504), 2015-07-01
Supplement: appi.ps.201400504.ds001.pdf [file appi.ps.201400504.ds001.pdf]

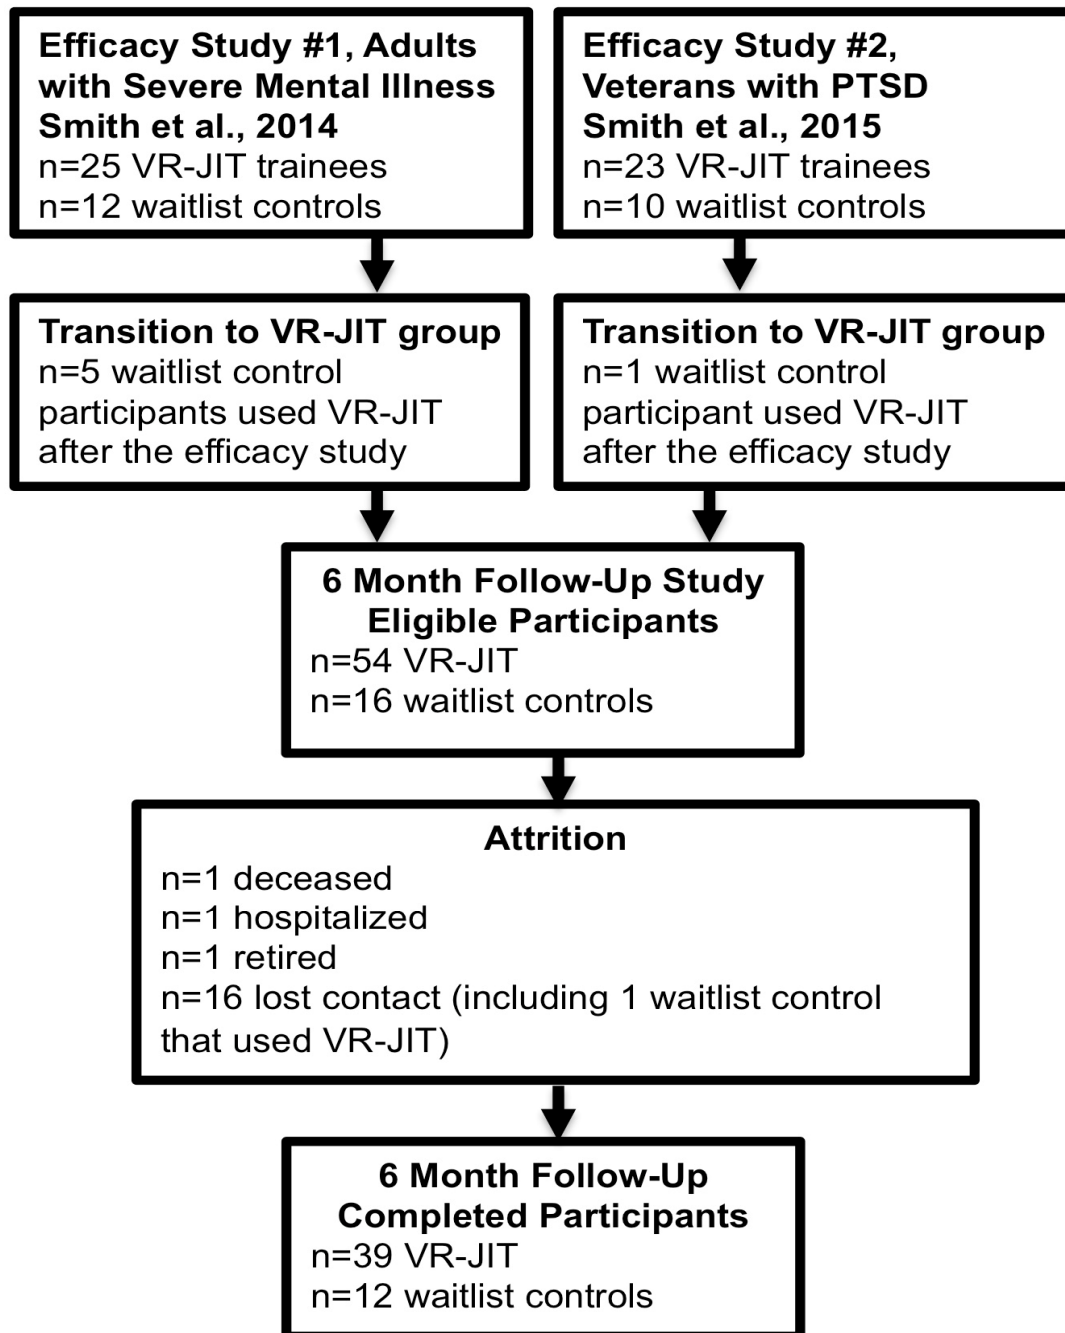

Supplemental Figure 1. Flow Chart of participants from two efficacy studies evaluated as a single follow-up cohort

Supplemental Table 1. VR-JIT group status as a predictor of a job offer

|                               | Step 1 |           | Step 2 |            |
|-------------------------------|--------|-----------|--------|------------|
|                               | OR     | 95% CI    | OR     | 95% CI     |
| Step 1                        |        |           |        |            |
| Neurocognition                | 1.06+  | 1.00-1.13 | 1.07+  | .99-1.15   |
| Months since prior employment | .97**  | .95-.99   | .96*   | .92-.99    |
| PTSD Diagnosis                | 3.57+  | .81-15.85 | 6.09*  | 1.08-34.40 |
| Step 2                        |        |           |        |            |
| VR-JIT group (yes or no)      | --     | --        | 9.18*  | 1.34-62.93 |

+p<.10, \*p<.05, \*\*p<.01;

Step 1 Nagelkerke R<sup>2</sup>=.40;

Step 2 Nagelkerke R<sup>2</sup>=.54.
